# Supplementary material
Source: PubMed Central journal article supplement (PMC6761541)
Supplement: AAC.01197-19-s0001.pdf [file AAC.01197-19-s0001.pdf]

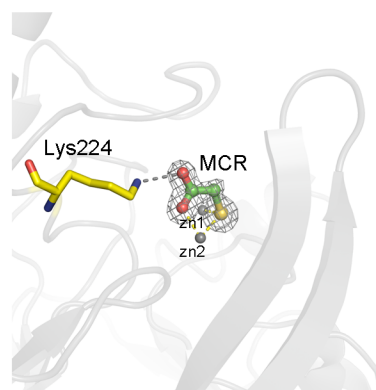

**FIG S1** (A) Schematic representation of the structure of IMP-1 in complex with MCR. The  $|F_o|-|F_c|$  omit map of MCR contoured at  $3.0 \sigma$  (gray mesh) is shown. MCR is illustrated using green (carbon), red (oxygen), and yellow (sulfur) sticks. The amino acid Lys224 of IMP-1 is shown as yellow sticks. Zinc ions are illustrated as gray spheres. Gray and yellow dashed lines indicate hydrogen and coordination bonds, respectively.

|       |                         |                                                    |
|-------|-------------------------|----------------------------------------------------|
|       |                         | 221 223                                            |
| SMB-1 | <i>S.marcescens</i>     | GITWTWQSCEQGKCKDVVFADSLTAVSADSYRFSD---HPEVVASLRGSF |
| AIM-1 | <i>P.aeruginosa</i>     | GTSWTWRSCGDDCRQMVYADSLTAISDDVFRYSDDAAHPGYLAAFRNTL  |
| LMB-1 | <i>E.cloacae</i>        | ALSWQWSSCEAGQCQVLVYADSLSPVSSDSYRFSE---HLTYLNAYRASL |
| POM-1 | <i>P.otitidis</i>       | SLSWTWTDRRDGKPLRIAYSDSLSPAGYSLWMNPR---FPKIAEAFRSGF |
| L1    | <i>S.maltophilia</i>    | STAWTWTDTRDGKPVRIAYADSLSPAGYQLKDNPR---YPRLIEDYKRTF |
| GOB-1 | <i>E.meningoseptica</i> | SCSFIFETKDEKRKYRVLIANMPSVIVDKKFSEVT--AYPNIQSDYAYTF |

**FIG S2** Amino acid alignments of B3 MBLs of human pathogenic bacteria. The GenBank accession numbers of the proteins are as follows: SMB-1 (BAL14456), AIM-1 (CAQ53840), LMB-1 (AMK49163), POM-1 (ADC79563), L1 (ABC02083), and GOB-1 (AAF04458).

**Table S1.** IC<sub>50</sub> values of 14 compounds for SMB-1

| No. | compounds                                                                           | IC <sub>50</sub> (μM) | No. | compounds                                                                            | IC <sub>50</sub> (μM) |
|-----|-------------------------------------------------------------------------------------|-----------------------|-----|--------------------------------------------------------------------------------------|-----------------------|
| 1   | 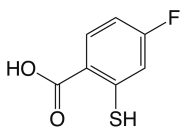   | 0.6                   | 8   |    | N.D                   |
| 2   |    | 15.0                  | 9   |    | N.D                   |
| 3   |    | 15.6                  | 10  |    | N.D                   |
| 4   |   | 39.4                  | 1a  |   | 0.2                   |
| 5   |  | 54.2                  | 1b  |  | 54.5                  |
| 6   |  | 125.3                 | 1c  |  | N.D                   |
| 7   |  | 272.7                 | 1d  |  | N.D                   |

N.D.: no apparent deceleration of hydrolyzing velocity in the presence of 200 μM of the compounds.

Measurements were performed using 100 μM nitrocefin as substrate.

**Table S2. Bacterial strains and plasmids used in this study**

| <b>strains</b>                | <b>characteristics</b>                                         | <b>sources</b> |
|-------------------------------|----------------------------------------------------------------|----------------|
| <i>E. coli</i> DH5 $\alpha$   | strain for cloning $\beta$ -lactamase gene and its expression  | In house       |
| <i>E. coli</i> BL21(DE3)      | strain for overexpression of $\beta$ -lactamases               | In house       |
| <i>E. coli</i> BL21(DE3)pLysS | strain for overexpression of $\beta$ -lactamases               | In house       |
| <i>E. coli</i> ATCC 25922     | strain for animal experiments                                  | In house       |
| <b>plasmids</b>               |                                                                |                |
| pBC-IMP-1                     | pBCSK+ vector carrying <i>bla</i> <sub>IMP-1</sub>             | this study     |
| pBC-NDM-1                     | pBCSK+ vector carrying <i>bla</i> <sub>NDM-1</sub>             | this study     |
| pBC-VIM-2                     | pBCSK+ vector carrying <i>bla</i> <sub>VIM-2</sub>             | this study     |
| pBC-L1                        | pBCSK+ vector carrying <i>bla</i> <sub>L1</sub>                | this study     |
| pCL-SMB-1                     | pCL1920 vector carrying <i>bla</i> <sub>SMB-1</sub>            | (1)            |
| pBC-LMB-1                     | pBCSK+ vector carrying <i>bla</i> <sub>LMB-1</sub>             | this study     |
| pET9a- $\Delta$ IMP-1         | IMP-1 expression vector                                        | (2)            |
| pET-dNDM-1                    | NDM-1 expression vector                                        | this study     |
| pET-VIM-2                     | VIM-2 expression vector                                        | this study     |
| pET-L1                        | L1 expression vector                                           | this study     |
| pET-SMB-1                     | SMB-1 expression vector                                        | (1)            |
| pET-AIM-1                     | AIM-1 expression vector                                        | this study     |
| pET28a                        | Plasmid for protein expression                                 | In house       |
| pET29a                        | Plasmid for protein expression                                 | In house       |
| pBCSK(+)                      | Plasmid for cloning $\beta$ -lactamase gene and its expression | In house       |

1. **Wachino J, Yoshida H, Yamane K, Suzuki S, Matsui M, Yamagishi T, Tsutsui A, Konda T, Shibayama K, Arakawa Y.** 2011. SMB-1, a novel subclass B3 metallo- $\beta$ -lactamase, associated with *ISCR1* and a class 1 integron, from a carbapenem-resistant *Serratia marcescens* clinical isolate. *Antimicrob Agents Chemother* **55**:5143-5149.
2. **Yamaguchi Y, Kuroki T, Yasuzawa H, Higashi T, Jin W, Kawanami A, Yamagata Y, Arakawa Y, Goto M, Kurosaki H.** 2005. Probing the role of Asp-120(81) of metallo- $\beta$ -lactamase (IMP-1) by site-directed mutagenesis, kinetic studies, and X-ray crystallography. *J Biol Chem* **280**:20824-20832.

**Table S3. Primers used in this study**

| Primer     | Sequences <sup>a</sup>                       |
|------------|----------------------------------------------|
| IMP-SK-F   | 5'-CGGGATCCTGCCCATTTGCGCGGATG-3'             |
| IMP-SK-R   | 5'-GGAATTC AAGTTGCGCGTTGTGGAATAC-3'          |
| VIM2-SK-F  | 5'-CCGGAATTC CCGTGGGTGCGATGGTTTGAT-3'        |
| VIM2-SK-R  | 5'-CGGGATCCATGCCTAACGCCGAAGTTCA-3'           |
| VIM2-pET-F | 5'-GGAATTC CATATGTTCAAAC TTTGAGTAAGTTATT-3'  |
| VIM2-pET-R | 5'-CGGGATCCCTACTCAACGACTGAGCGATTTGTGTG-3'    |
| NDM1-SK-F  | 5'-CCGGAATTC ATGGCAGATTGGGGGTGAC-3'          |
| NDM1-SK-R  | 5'-CGGGATCCCGCCCCATATTTTGTACAGT-3'           |
| NDM1-pET-F | 5'-GGAATTC CATATGGGTGAAATCCGCCCGACGATTGGC-3' |
| NDM1-pET-R | 5'-CCCAAGCTTTCAGCGCAGCTTGTCGGCCATGC-3'       |
| LMB-SK-F   | 5'-CCGGAATTC AAACCGTAAACCCGGTAATTA-3'        |
| LMB-SK-R   | 5'-CGGGATCC TTACCCGCTGGCCAAGTTGCGG-3'        |
| L1-pET-F   | 5'-GGAATTC CATATGCGTTGTTCCCTGCTCGCCTTCG-3'   |
| L1-pET-R   | 5'-CGGGATCC TCAGCGGTGTGCCGCAGTTTCCTTGCC-3'   |
| AIM1-pET-F | 5'-GGAATTC CATATGAAACGCCGTTTACCTTA-3'        |
| AIM1-pET-R | 5'-CCCAAGCTTTTACGGACGTGCACCTGACGA-3'         |

<sup>a</sup>Underlined text indicates the cleavage sites for restriction endonucleases.

Table S4. Structural data

|                                                 | IMP-1-MCR<br>complex      | SMB-TSA<br>complex        | SMB-ASB<br>complex        |
|-------------------------------------------------|---------------------------|---------------------------|---------------------------|
| <b>Data collection</b>                          |                           |                           |                           |
| Beam line                                       | NW-12A<br>(PF)            | BL2S1<br>(AichiSR)        | BL-5A<br>(PF)             |
| Wavelength (Å)                                  | 1.00                      | 1.12                      | 1.00                      |
| Resolution range (Å)                            | 56.82–1.57<br>(1.65–1.57) | 40.61–1.39<br>(1.47–1.39) | 50.00–1.17<br>(1.19–1.17) |
| Space group                                     | <i>P</i> 212121           | <i>P</i> 1                | <i>P</i> 1                |
| <b>Cell dimensions</b>                          |                           |                           |                           |
| <i>a</i> (Å)                                    | 35.9                      | 37.0                      | 40.0                      |
| <i>b</i> (Å)                                    | 56.8                      | 41.6                      | 41.7                      |
| <i>c</i> (Å)                                    | 101.1                     | 45.6                      | 45.7                      |
| $\alpha$ (°)                                    | 90.0                      | 108.6                     | 108.8                     |
| $\beta$ (°)                                     | 90.0                      | 102.8                     | 102.8                     |
| $\gamma$ (°)                                    | 90.0                      | 106.1                     | 105.9                     |
| No. of unique reflections                       | 29943 (4256)              | 42083 (5988)              | 73794 (2884)              |
| Redundancy                                      | 11.3 (11.2)               | 3.7 (3.8)                 | 3.5 (3.2)                 |
| Completeness (%)                                | 100.0 (100.0)             | 90.3 (87.9)               | 93.1 (71.4)               |
| $R_{\text{merge}}$ (%)                          | 6.4 (35.4)                | 5.6 (7.7)                 | 4.1 (8.7)                 |
| mean $I/\sigma(I)$                              | 22.2 (6.4)                | 16.6 (12.2)               | 37.3 (16.3)               |
| <b>Refinement</b>                               |                           |                           |                           |
| $R_{\text{working}}$ (%)                        | 16.7                      | 14.8                      | 13.0                      |
| $R_{\text{free}}$ (%)                           | 20.0                      | 17.0                      | 15.1                      |
| <b>Average <i>B</i>-factors (Å<sup>2</sup>)</b> |                           |                           |                           |
| Protein                                         | 21.6                      | 9.5                       | 8.9                       |
| Ligand/ion                                      | 29.7                      | 16.2                      | 15.0                      |
| Water                                           | 32.0                      | 19.6                      | 20.9                      |
| <b>r.m.s.d.</b>                                 |                           |                           |                           |
| Bond lengths (Å)                                | 0.008                     | 0.008                     | 0.009                     |
| Bond angles (°)                                 | 1.266                     | 1.304                     | 1.453                     |

## Supplementary methods

### Purification of MBLs.

**IMP-1 expression and purification.** The recombinant plasmid (pET9a- $\Delta$ IMP-1) was introduced into *Escherichia coli* BL21(DE3). The transformants were grown at 37°C in Luria-Bertani (LB) broth until the OD<sub>610</sub> was 0.6, at this point isopropyl  $\beta$ -D-1-thiogalactopyranoside (IPTG) was added at a final concentration of 0.5 mM. After incubation for another 3 h at 37°C, bacterial cells were harvested, suspended in 50 mM Tris-HCl buffer (pH 7.5), and disrupted by sonication. The supernatant obtained after ultracentrifugation (100,000 x g, 1 h) was loaded onto a HiTrap SP HP column (GE Healthcare) and eluted using a linear gradient of 0 to 0.5 M NaCl in 50 mM Tris-HCl buffer (pH 7.5). The eluted protein was dialyzed against 50 mM Tris-HCl (pH 7.5) containing 0.3 M NaCl and 2.0 M ammonium sulfate, loaded onto a HiTrap Phenyl HP column (GE Healthcare), and eluted with 50 mM Tris-HCl (pH 7.5) containing 0.3 M NaCl. The protein was loaded onto a HiLoad 16/60 Superdex 200 pg column (GE Healthcare), and then eluted with 50 mM Tris-HCl (pH 7.5) containing 0.3 M NaCl. Lastly, the protein was buffer-exchanged into 20 mM 4-(2-hydroxyethyl)-1-piperazineethanesulfonic acid (HEPES) buffer (pH 7.5). The purified protein was stored at -80°C until use. The concentration of the eluted protein was determined using a Pierce BCA Protein Assay Kit (Thermo Fisher Scientific) and its purity was estimated by sodium dodecyl sulfate-polyacrylamide gel (SDS-PAGE) analysis and Coomassie Brilliant Blue staining.

**NDM-1 expression and purification.** The recombinant plasmid (pET-dNDM-1) was introduced into *E. coli* BL21(DE3). The transformants were grown at 37°C in LB broth until an OD<sub>610</sub> of 0.4 was achieved, at this point IPTG was added at a final concentration of 0.5 mM. After incubation at 25°C for another 24 h, bacterial cells were harvested, suspended in 50 mM Tris-HCl buffer [pH 8.0] containing 0.5 M NaCl, 20 mM imidazole, 10 mM  $\beta$ -mercaptoethanol, and 1 mM ZnCl<sub>2</sub> (buffer A), and disrupted. The supernatant obtained after ultracentrifugation was loaded onto a HisTrap HP column (GE Healthcare) and eluted using a linear imidazole gradient in the buffer A. The eluted protein was dialyzed against buffer A and digested with thrombin at 20°C for 24 h. The digested protein was loaded onto a HisTrap HP column, and unbound fractions were collected. The protein was loaded onto a HiTrap Q HP column (GE Healthcare) and eluted using a linear gradient of 0.02 to 0.5 M NaCl in 20 mM Tris-HCl buffer (pH 8.0) containing 2

mM DTT. Finally, the eluted protein was loaded onto a HiLoad 16/60 Superdex 200 pg column and eluted with 20 mM of Tris-HCl (pH 8.0) containing 0.15 M NaCl and 2 mM DTT.

**VIM-2 expression and purification.** *E. coli* BL21(DE3) carrying pET-VIM-2 were cultured, suspended in 30 mM of Tris-HCl buffer (pH 7.6) containing 0.5 M NaCl, and disrupted. The supernatant after ultracentrifugation was dialyzed against 50 mM of HEPES-NaOH buffer (pH 7.5) containing 50  $\mu$ M ZnSO<sub>4</sub> (buffer B). The crude protein was loaded onto a HiTrap SP HP column and eluted using a linear gradient of 0 to 1.0 M NaCl in buffer B. The eluted protein was dialyzed against 50 mM Tris-HCl buffer containing 0.1 M NaCl, 1.2 M (NH<sub>4</sub>)<sub>2</sub>SO<sub>4</sub>, and 50  $\mu$ M ZnSO<sub>4</sub> (buffer C), loaded onto a HiTrap Phenyl HP column, and eluted with buffer C that did not contain (NH<sub>4</sub>)<sub>2</sub>SO<sub>4</sub>. The obtained protein was loaded onto a HiLoad 16/60 Superdex 200 pg column and then eluted with 20 mM Tris-HCl (pH 7.5) containing 0.2 M NaCl and 0.1 mM ZnCl<sub>2</sub>. Finally, the protein was buffer-exchanged into 20 mM Tris-HCl (pH 7.5) buffer containing 0.1 mM ZnCl<sub>2</sub>, and stored at -80°C until use.

**L1 expression and purification.** The pET-L1 plasmid was introduced into *E. coli* BL21(DE3). Transformants were grown at 37°C, harvested, and disrupted. The supernatant obtained by ultracentrifugation was loaded onto a HiTrap SP HP column (GE Healthcare) and eluted using a linear gradient of 0 to 0.5 M NaCl in 30 mM MES buffer. The eluted protein was buffer-exchanged against 50 mM HEPES (pH 7.5) containing 2.0 M ammonium sulfate, loaded onto a HiTrap Phenyl HP column, and eluted with 50 mM of HEPES (pH 7.5) buffer. Finally, the protein was loaded onto a HiLoad 16/60 Superdex 200 pg column and then eluted with 50 mM of HEPES-NaOH (pH 7.5) buffer containing 0.2 M NaCl.

**AIM-1 expression and purification.** pET-AIM-1 was introduced into *E. coli* BL21(DE3). The cells were grown, harvested, suspended with 20 mM Tris-HCl (pH 7.5) buffer, and disrupted by sonication. After ultracentrifugation, the supernatant was loaded onto a HiTrap Q HP column, and eluted with a gradient of 20 mM Tris-HCl (pH 7.5) buffer containing 0.5 M NaCl. The eluted proteins were buffer-exchanged to 20 mM Tris-HCl (pH 7.5) buffer containing 0.3 M NaCl and 1.5 M (NH<sub>4</sub>)<sub>2</sub>SO<sub>4</sub>, loaded onto a HiTrap Phenyl HP column, and eluted with 20 mM Tris-HCl (pH 7.5) buffer containing 0.3 M NaCl. Finally, the collected proteins were subjected to size-exclusion chromatography using a Hiload 16/60 Superdex 200 pg column and eluted with 50 mM Tris-HCl (pH 7.5)



buffer containing 0.1 M NaCl.
